# Supplementary material
Source: PubMed Central journal article supplement (PMC129779)
Supplement: pnas_212387899_3.pdf [file pnas_212387899_3.pdf]

**Table 2. DNA sequences of primers used in RT-PCR amplification of *Salmonella* LSMMG-regulated genes**

|               |                                                                                                |
|---------------|------------------------------------------------------------------------------------------------|
| <i>rstB</i> : | Accession: AE008764<br>5' CAGACTGACCTGAACGGTGGTAT;<br>3' CGCTCATTGCCTTTTCTCTCG                 |
| <i>ydcI</i> : | Accession: AE8771<br>5' CTGAACGAACTGGAACAACCTCACC;<br>3' ATTCTCCGACAGCCGCTATCACAG              |
| <i>yfdH</i> : | Accession: AE008721<br>5' TGAACGCCACCCAGAAAAAG;<br>3' TCCGATAGAAGTAATCCCCCATC                  |
| <i>cyaA</i> : | Accession: AE008884<br>5' ACGGTGAAATCGTATCGTTTGG;<br>3' ATCGGCGACCATCTCCTGTAAC                 |
| <i>dppA</i> : | Accession: AE008868<br>5' AACGCCAATCTTCGCCCAATCC;<br>3' ACGCCGATGATGTCGTGTTC                   |
| <i>fimA</i> : | Accession: AE008721<br>5' AACGGAGCCGACAGGATGCCGAAACCGGG;<br>3' CTGCCAGGACCGGTAAACGCATTCGTGCGG  |
| <i>invI</i> : | Accession: AE008832<br>5' CTGACCAGAATTAAGTATTGCAGCGGCG;<br>3' GAGATTCCCGTGGCGTTATCGGTTACTTCAC  |
| <i>prgI</i> : | Accession: AE008831<br>5' CATGGGGAGGACGCTATGTGCAGTTTGCG;<br>3' TATCGACGAATCATGAGCGTAATAGCGTTTC |
| <i>ssaK</i> : | Accession: AE008761<br>5' CGGCAATTGCTTCTACAGTGGTTTAGCGAGG;                                     |

3' CGGGAGAGAAACCAGGCTCGATAATCAACG

*sseB*: Accession: AE008815

5' GCTTCGGCGTCAGCAACGCTGATACCG;

3' CTGCGGCGCATCAATCTTAATTTGTGCCGC

*adiY*: Accession: AE008901

5' GCCAATGCTGCTATTATCGTGTC;

3' CGAGTAAATGGTAAGGAGCCAATC

*fruK*: Accession: AE:008798

5' GCCGTAAATCAATCCGCCAAC;

3' TCGCTAACCGCTTTCAGGTG
