# Supplementary material
Source: PubMed Central journal article supplement (PMC129779)

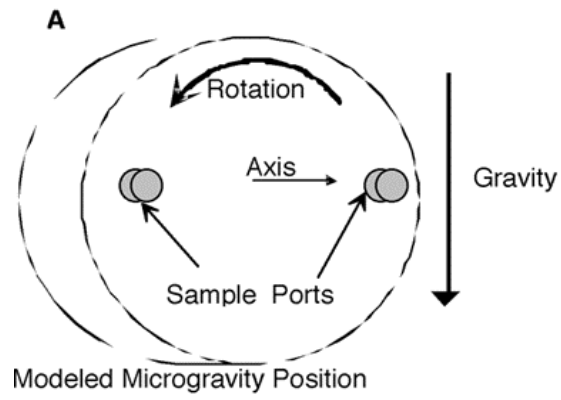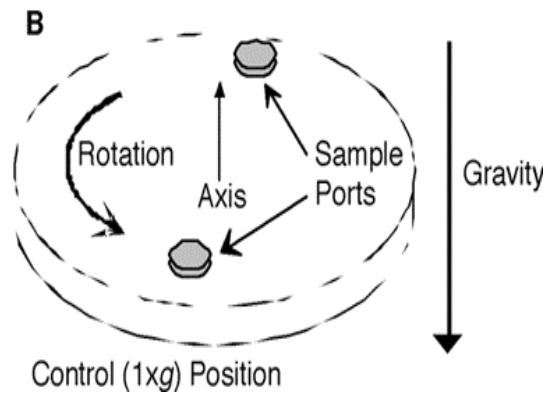

Supplement: pnas_212387899_4.pdf [file pnas_212387899_4.pdf]
